# Supplementary material
Source: PubMed Central journal article supplement (PMC5883614)
Supplement: mmc1.pdf [file mmc1.pdf]

**Biophysical Journal, Volume 114**

**Supplemental Information**

**Molecular Mechanisms of Tight Binding through Fuzzy Interactions**

**Qingliang Shen, Jie Shi, Danyun Zeng, Baoyu Zhao, Pingwei Li, Wonmuk Hwang, and Jae-Hyun Cho**

**Table S1.** X-ray diffraction and refinement statistics for nSH3-PRM<sup>NS1</sup> complex.

|                                                     | 6ATV.PDB             |
|-----------------------------------------------------|----------------------|
| <b>Data collection</b>                              |                      |
| Space group                                         | P6 <sub>1</sub> 22   |
| Cell dimensions                                     |                      |
| <i>a</i> , <i>b</i> , <i>c</i> (Å)                  | 39.84, 39.84, 171.95 |
| $\alpha$ , $\beta$ , $\gamma$ (°)                   | 90.0, 90.0, 120.0    |
| Resolution (Å)                                      | 1.75 (1.78 to 1.75)  |
| <i>R</i> <sub>merge</sub>                           | 10.2% (23.3%)        |
| <i>I</i> / $\sigma$ <i>I</i>                        | 16.8 (3.5)           |
| Completeness (%)                                    | 94.9 (67.0)          |
| Redundancy                                          | 12.0 (3.3)           |
| <b>Refinement</b>                                   |                      |
| Resolution (Å)                                      | 1.75                 |
| No. Reflections                                     | 8437                 |
| <i>R</i> <sub>work</sub> / <i>R</i> <sub>free</sub> | 0.184/0.205          |
| No. atoms                                           | 721                  |
| Protein                                             | 493                  |
| Ligand                                              | 114                  |
| Water                                               | 114                  |
| <i>B</i> -factors                                   |                      |
| Protein                                             | 18.8                 |
| Ligand                                              | 18.8                 |
| Water                                               | 32.8                 |
| r.m.s. deviations                                   |                      |
| Bond lengths (Å)                                    | 0.006                |
| Bond angles (°)                                     | 0.781                |

\* Values in parentheses are for the highest-resolution shells.

**Table S2-1.** The difference in average pairwise distances.

| Residues<br>in<br>PRM <sup>NS1</sup> | Difference in average pairwise distances (MD <sup>a</sup> - Crystal <sup>b</sup> ) (Å) |                |                |                |                |                |
|--------------------------------------|----------------------------------------------------------------------------------------|----------------|----------------|----------------|----------------|----------------|
|                                      | Acidic residues in nSH3 domain                                                         |                |                |                |                |                |
|                                      | D142                                                                                   | D147           | E149           | D150           | D163           | E166           |
| R211                                 | 0.0                                                                                    | - <sup>c</sup> |
| K219                                 | - <sup>c</sup>                                                                         | 1.5            | 1.3            | 0.5            | -0.2           | 0.7            |
| R220                                 | - <sup>c</sup>                                                                         | -1.4           | -1.3           | -2.6           | -5.4           | -5.4           |
| K221                                 | - <sup>c</sup>                                                                         | -1.3           | 1.8            | -0.0           | 2.6            | -0.5           |

<sup>a</sup>MD trajectories of PRM<sup>NS1A</sup><sup>b</sup>Crystal structure of PRM<sup>NS1A</sup> (PDB ID: 5UL6)<sup>c</sup>These distances were longer than 15 Å and not included in the analysis.**Table S2-2.** The difference in average pairwise distances.

| Residues<br>in<br>PRM <sup>NS1</sup> | Difference in average pairwise distances (MD <sup>a</sup> - Crystal <sup>b</sup> ) (Å) |                |                |                |                |                |
|--------------------------------------|----------------------------------------------------------------------------------------|----------------|----------------|----------------|----------------|----------------|
|                                      | Acidic residues in nSH3 domain                                                         |                |                |                |                |                |
|                                      | D142                                                                                   | D147           | E149           | D150           | D163           | E166           |
| R211                                 | -1.7                                                                                   | - <sup>c</sup> |
| K219                                 | - <sup>c</sup>                                                                         | -6.1           | -4.0           | -4.9           | 1.9            | -1.6           |
| R220                                 | - <sup>c</sup>                                                                         | -0.6           | 0.5            | 1.1            | 3.2            | 0.9            |
| K221                                 | - <sup>c</sup>                                                                         | -5.6           | -3.6           | -3.0           | 5.0            | -0.3           |

<sup>a</sup>MD trajectories of PRM<sup>NS1B</sup><sup>b</sup>Crystal structure of PRM<sup>NS1B</sup> (PDB ID: 6ATV)<sup>c</sup>These distances were longer than 15 Å and not included in the analysis.

Figure S1

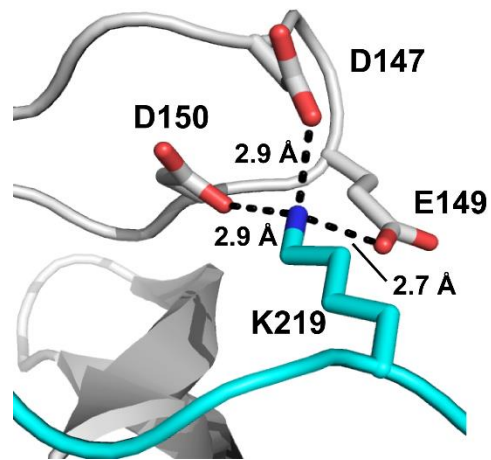

**Figure S1.** (A) The complex contains short-range electrostatic interactions between K217 of PRM<sup>NS1</sup> and three acidic residues (D147, E149, and D150) in the nSH3 domain (PDB ID: 6ATV). The distances in the figure were measured between N<sup>ζ</sup> of K219 and O<sup>δ/e</sup> of the acidic residues.

Figure S2

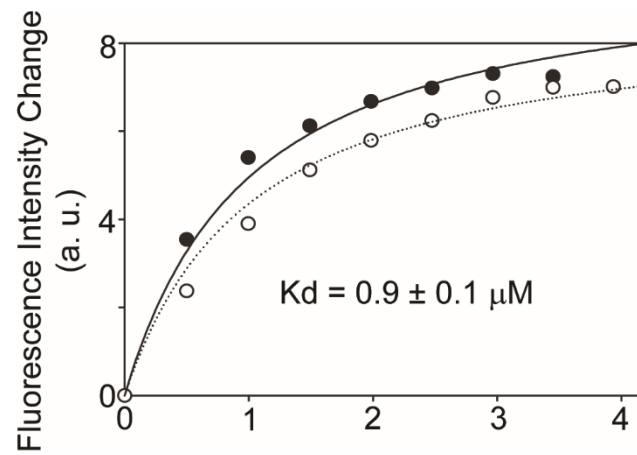

**Figure S2.** Fluorescence-based measurement of binding affinity between the nSH3 domain and mutant PRM<sup>NS1</sup>, in which three C-terminal positively charged residues (K219-R220-K221) are replaced by Gly. The  $K_d$  value is from two repeated measurements.

Figure S3.

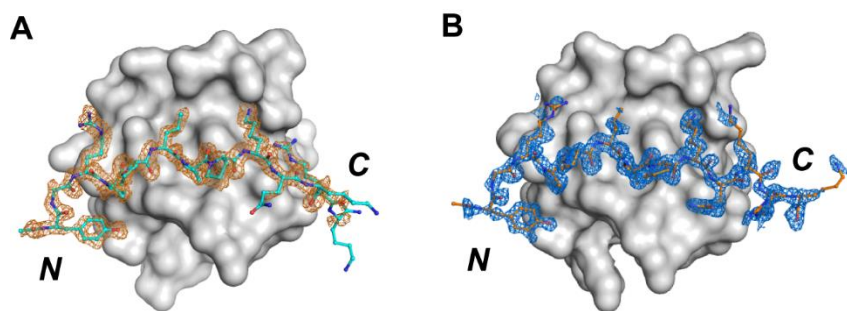

**Figure S3.**  $\sigma_A$  weighted  $F_o - F_c$  map (contoured at  $2\sigma$ ) of (A) PRM<sup>NS1B</sup> and (B) PRM<sup>NS1A</sup>.

Figure S4.

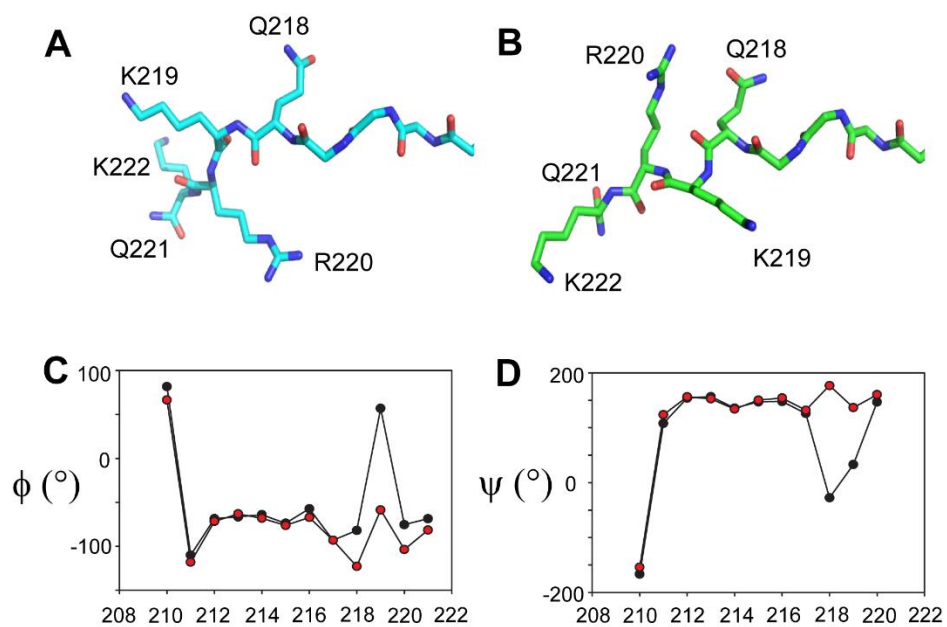

**Figure S4.** Conformational difference in the C-terminal region of the bound (A) PRM<sup>NS1B</sup> and (B) PRM<sup>NS1A</sup>. Significant changes in backbone (C)  $\phi$  and (D)  $\psi$  angles of Q218 induced large changes in the conformations of positively charged residues in the C-terminal end of Q218.

Figure S5

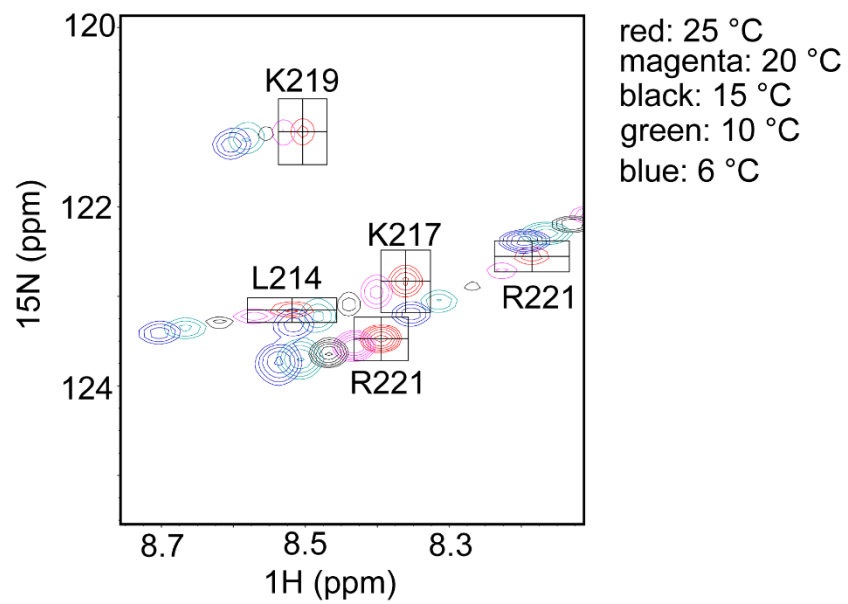

**Figure S5.** An overlay of temperature-dependent chemical shift changes for the C-terminal positively charged residues (K217, K219, R220, and K221) in PRM<sup>NS1</sup>.



Figure S6

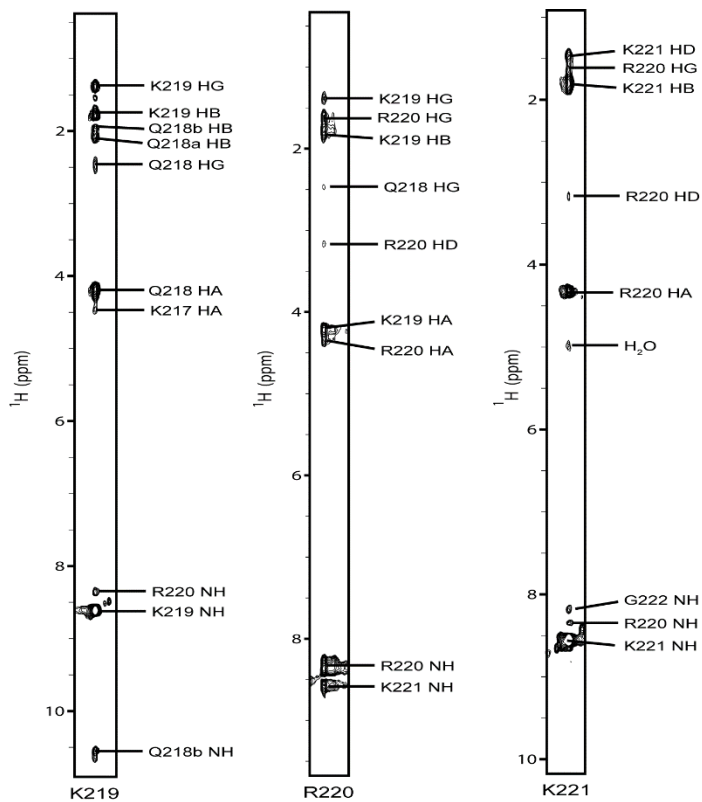

**Figure S6.** <sup>15</sup>N-edited NOESY HSQC of the C-terminal positively charged residues (K219, R220, and K221) in PRM<sup>NS1</sup> bound to the nSH3 domain. The data was acquired using a sample of <sup>15</sup>N-labeled PRM<sup>NS1</sup> saturated by non-labeled nSH3 domain. The NOESY mixing time was 100 ms.

Figure S7

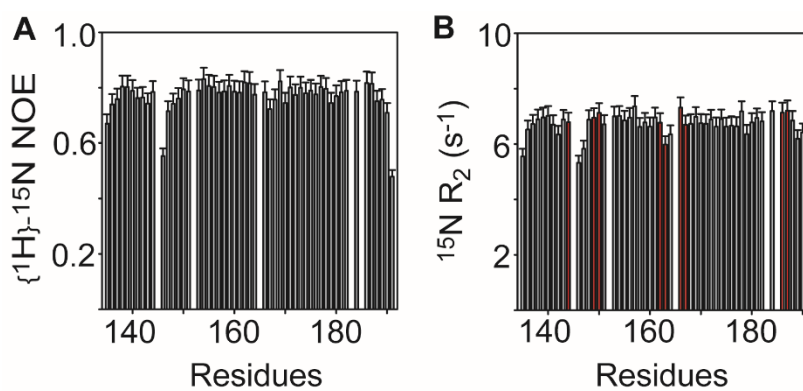

**Figure S7.** (A)  $\{^1\text{H}\}$ - $^{15}\text{N}$  heteronuclear NOE and (B)  $^{15}\text{N}$   $R_2$  of the nSH3 domain saturated by PRM<sup>NS1</sup>. Red bars represent the residues in the nSH3 domain that are in the binding interface with PRM<sup>NS1</sup>. This represents that the elevated  $R_2$  in PRM<sup>NS1</sup> is not induced by its on-off process.
